# Supplementary material for: [(Y1−xGdx)0.95Eu0.05]2(OH)5NO3·nH2O (0 ≤ x ≤ 0.50) layered rare-earth hydroxides: exfoliation of unilamellar and single-crystalline nanosheets, assembly of highly oriented and transparent oxide films, and greatly enhanced red photoluminescence by Gd3+ doping
Source: Royal Society of Chemistry journal article supplement (doi:10.1039/c5ra09784c), 2015-01-01
Supplement: c5ra09784c1.pdf [file c5ra09784c1.pdf]

## Supplementary Information

$[(Y_{1-x}Gd_x)_{0.95}Eu_{0.05}]_2(OH)_5NO_3 \cdot nH_2O$  ( $0 \leq x \leq 0.50$ ) layered rare-earth hydroxides: exfoliation of unilamellar and single-crystalline nanosheets, assembly of highly oriented and transparent oxide films, and greatly enhanced red photoluminescence by  $Gd^{3+}$  doping

Qi Zhu<sup>1</sup>, Ji-Guang Li<sup>1,2\*</sup>, Xiaodong Li<sup>1</sup>, Yang Qi<sup>3</sup> and Xudong Sun<sup>1</sup>

<sup>1</sup>*Key Laboratory for Anisotropy and Texture of Materials (Ministry of Education), School of Materials and Metallurgy, Northeastern University, Shenyang, Liaoning 110819, China*

<sup>2</sup>*Advanced Materials Processing Unit, National Institute for Materials Science, Namiki 1-1, Tsukuba, Ibaraki 305-0044, Japan*

<sup>3</sup>*Institute of Materials Physics and Chemistry, School of Sciences, Northeastern University, Shenyang, Liaoning 110819, China*

\*E-mail: [LLJiguang@nims.go.jp](mailto:LLJiguang@nims.go.jp)

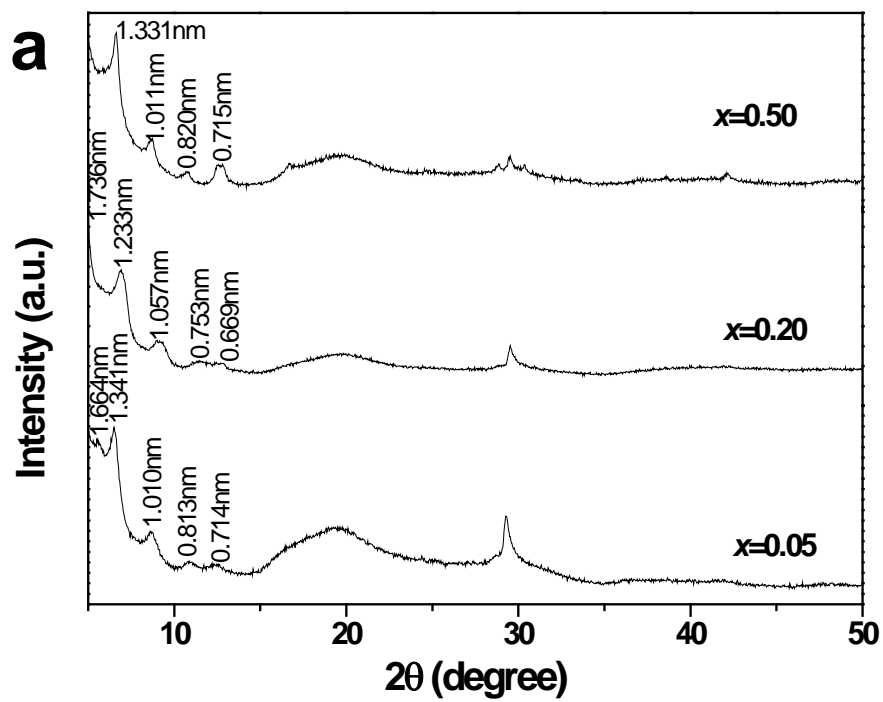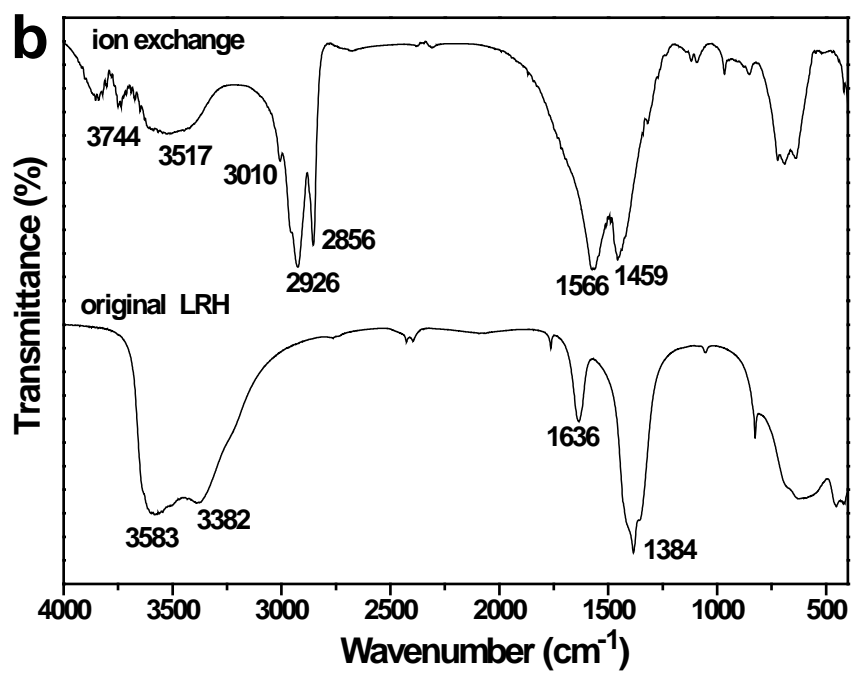

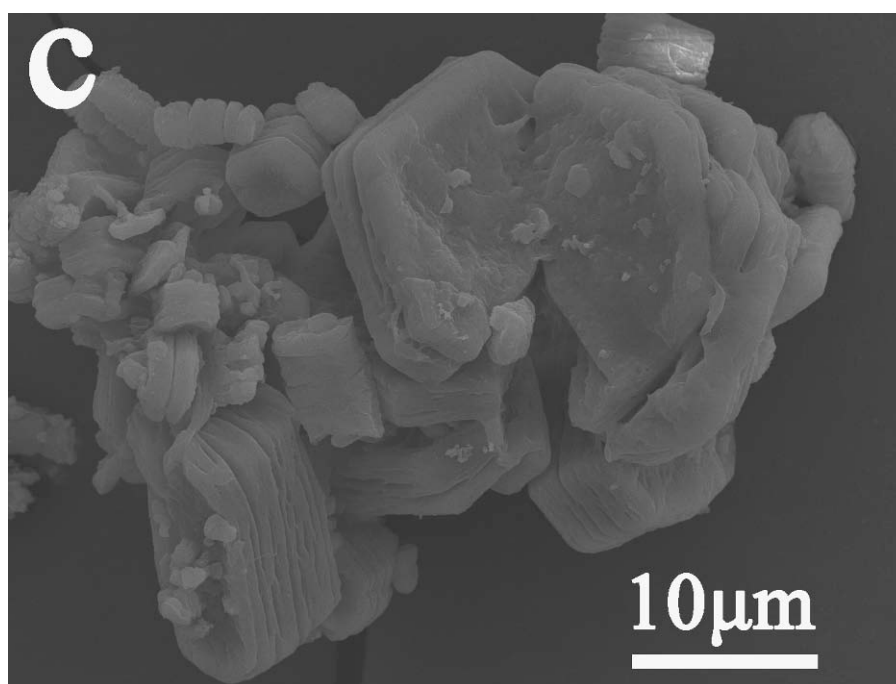

**Figure S1** (a) XRD patterns of the LRH-oleate samples obtained by hydrothermal anion exchange. (b) FTIR spectra for the pristine LRH ( $x=0.20$ ) and its oleate-exchange derivative. (c) is FE-SEM morphology of the LRH-oleate sample.
